# Supplementary material for: A new FeOCl/graphene quantum dot catalyst for peroxymonosulfate activation to efficiently remove organic pollutants and inactivate Escherichia coli
Source: Royal Society of Chemistry journal article supplement (doi:10.1039/d1nj05389b), 2022-01-01
Supplement: d1nj05389b1.pdf [file d1nj05389b1.pdf]

## SUPPORTING INFORMATION

### **New FeOCl/graphene quantum dots catalyst for peroxymonosulfate activation to efficiently remove organic pollutants and inactivate *Escherichia coli***

Xin Sun<sup>a</sup>, Hongai Zheng<sup>a\*</sup>, Shuangyan Jiang<sup>a</sup>, Meilin Zhu<sup>a</sup>, Yao Zhou<sup>a</sup>, Derui Wang<sup>a</sup>, Yankun Fan<sup>a</sup>,  
Lili Hu<sup>a</sup>, Daquan Zhang<sup>a</sup>, Lizhi Zhang<sup>b\*\*</sup>

<sup>a</sup> College of Environmental and Chemical Engineering, Shanghai University of Electric Power, Shanghai 200090, China

<sup>b</sup> Department of Orthopedic Surgery, Shanghai Yangpu District Central Hospital, Yangpu Hospital affiliated to Tongji University. No. 450 TengYue Road, Shanghai, 200090, China

\*E-mail: zhenghongai@shiep.edu.cn

\*\*E-mail: drzhanglizhi001@163.com

**Table S1** Details of the analysis of other pollutants

| Chemicals | Methods                                                                                                                                                 |
|-----------|---------------------------------------------------------------------------------------------------------------------------------------------------------|
| ATZ       | Measured by HPLC. The mobile phase consisted of methanol and water (v/v, 7:3) at a flow rate of 1 mL/min with the detection wavelength at 254 nm.       |
| BPA       | Measured by HPLC. The mobile phase consisted of acetonitrile and water (v/v, 6:4) at a flow rate of 0.8 mL/min with the detection wavelength at 280 nm. |
| OPP       | Measured by HPLC. The mobile phase consisted of acetonitrile and water (v/v, 6:4) at a flow rate of 0.8 mL/min with the detection wavelength at 254 nm. |
| RIF       | Measured by UV-vis with the detection wavelength at 473 nm.                                                                                             |

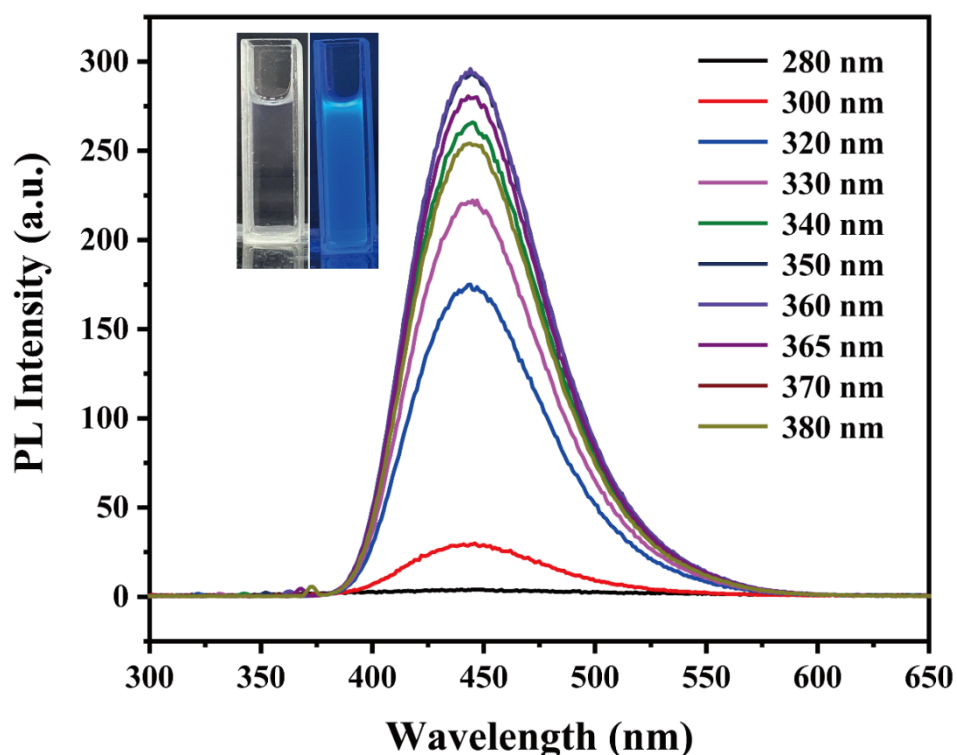

**Fig.S1.** The photoluminescent (PL) spectra of GQDs under different excitation wavelengths of 280–380 nm. The insets are optical images of the GQDs aqueous solution excited by 365nm.

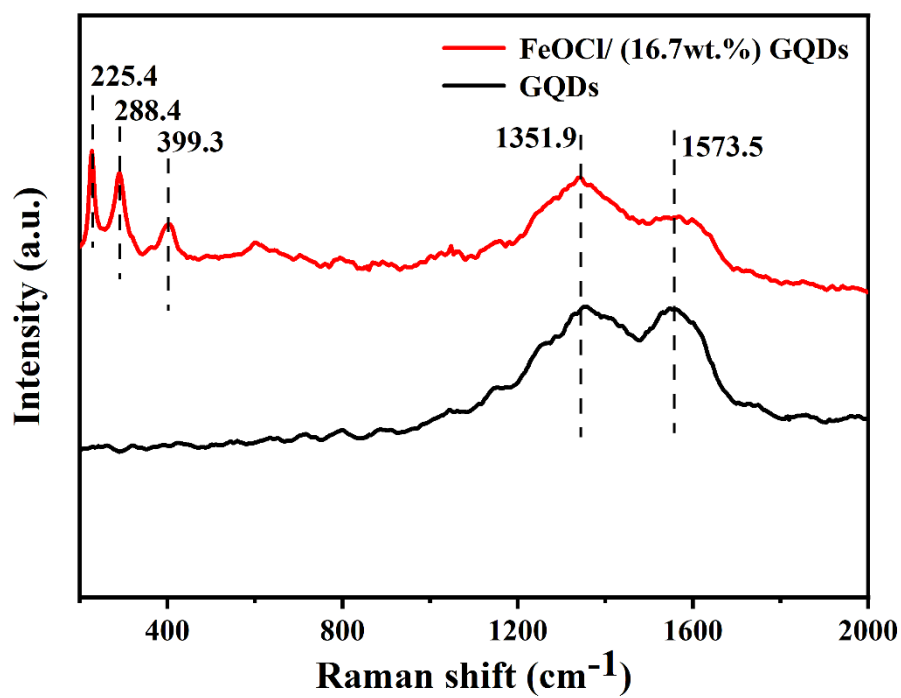

Fig.S2. Raman spectra of GQDs and FeOCl/ (16.7wt.%) GQDs.

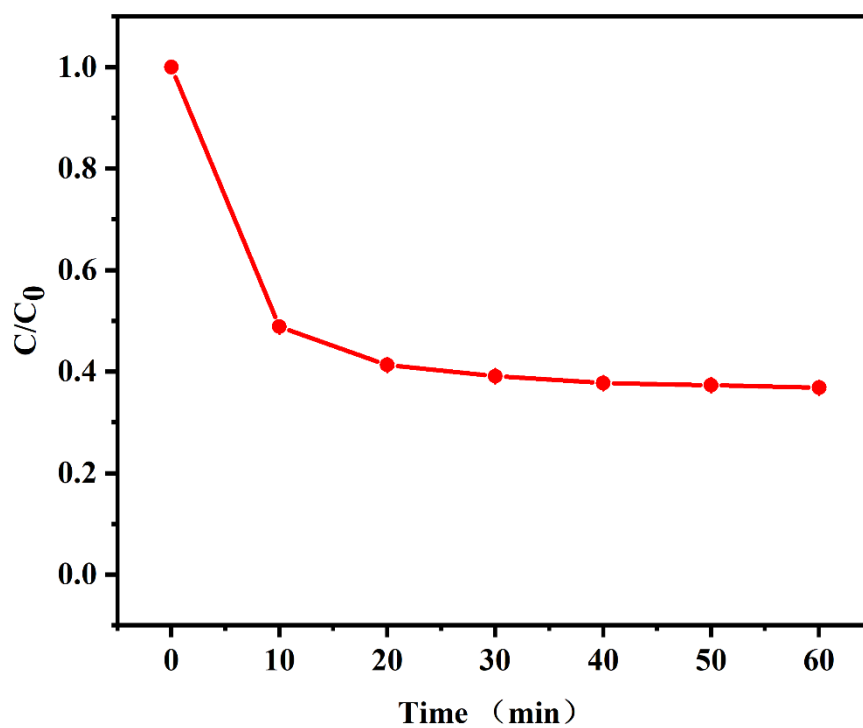

Fig.S3. Degraded 50  $\text{mg L}^{-1}$  RhB in 60 min. (Reaction conditions: initial pH=5.7, temperature = 25  $^{\circ}\text{C}$ , [RhB]=50  $\text{mg L}^{-1}$ , [Catal]=0.2  $\text{g L}^{-1}$ , [PMS]=0.2  $\text{mM}$ .)

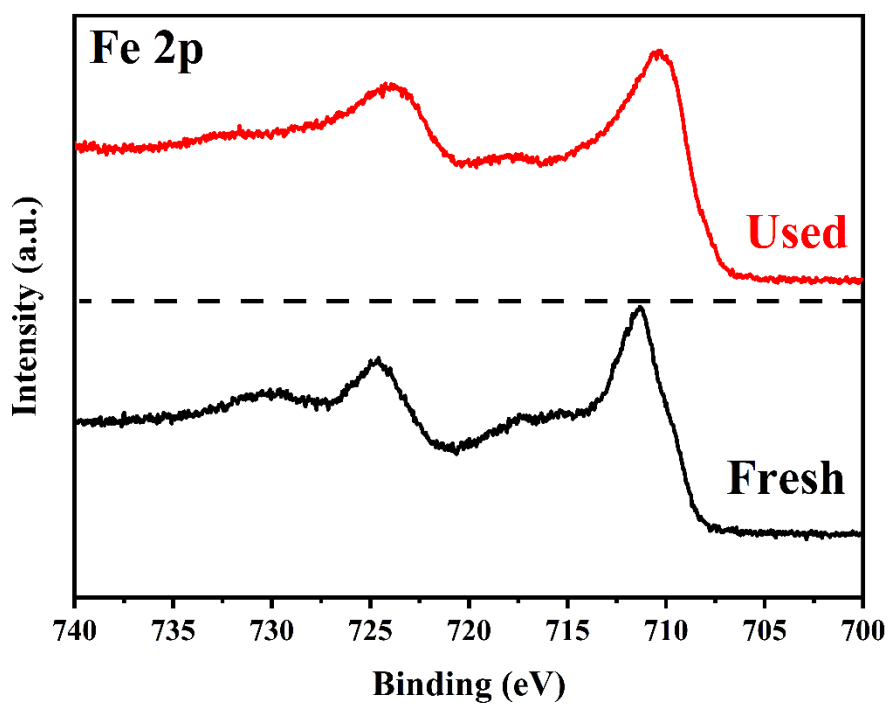

Fig.S4. High resolution XPS spectra of Fe 2p of fresh FeOCl/ (16.7wt.%) GQDs and used FeOCl/ (16.7wt.%) GQDs.

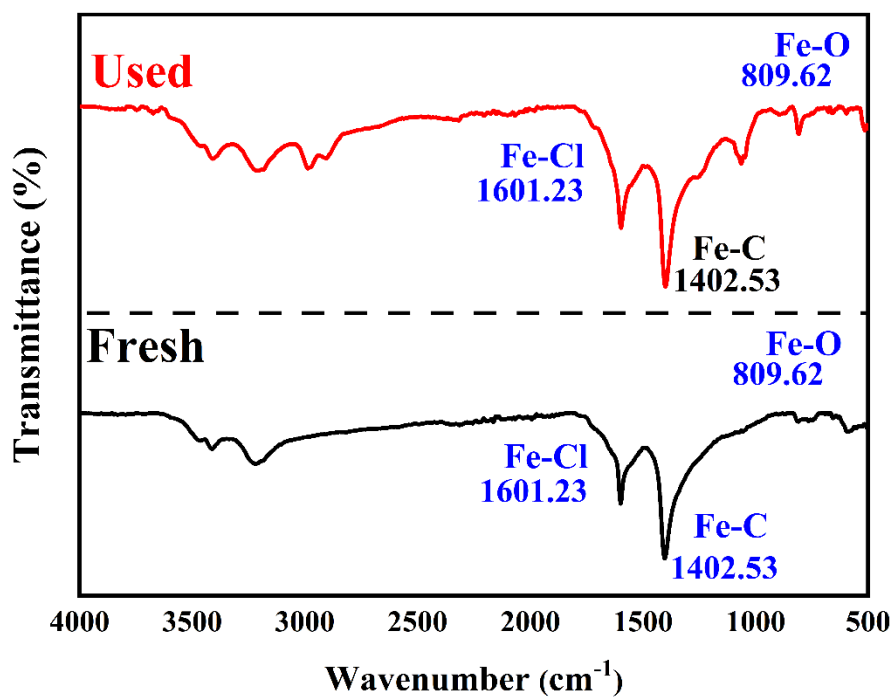

Fig.S5. FTIR spectra of fresh FeOCl/ (16.7wt.%) GQDs and used FeOCl/ (16.7wt.%) GQDs.

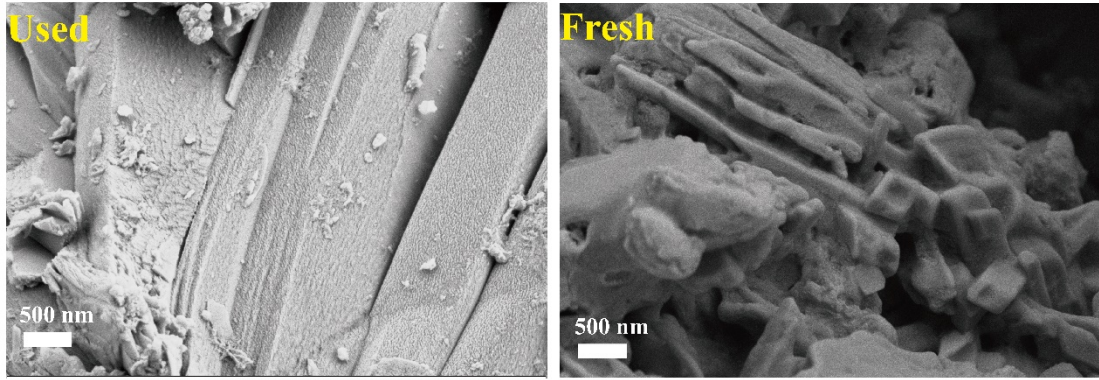

**Fig.S6.** SEM of fresh FeOCl/ (16.7wt.%) GQDs and used FeOCl/ (16.7wt.%) GQDs.
